# Supplementary material for: Phenotyping of Chronic Obstructive Pulmonary Disease Based on the Integration of Metabolomes and Clinical Characteristics
Source: MDPI journal article supplement (doi:10.3390/ijms19030666), 2018-02-27
Supplement: s1 [file s1]

## Supplementary material

**Table S1.** Parameters of the patients with chronic obstructive pulmonary disease (n = 25) and the control individuals (n = 21) that contributed the most to the first 5 principal components if all data (clinical and demographic data and metabolic profile of exhaled breath condensate and serum including targeted analyses of the metabolites in serum) were subjected to principal component analysis. The percentage in parenthesis after principal component indicates the fraction from total variance explained by the respective principal component. .

| Principal component 1 (14%) | Principal component 2 (12%)         | Principal component 3 (8.2%)   | Principal component 4 (4.8%) | Principal component 5 (4.5%)       |
|-----------------------------|-------------------------------------|--------------------------------|------------------------------|------------------------------------|
| bp341                       | Ever smoked                         | Ever smoked                    | Ever smoked                  | Ever smoked                        |
| bp342                       | PEF (% predicted)                   | bn250                          | PC aa C36:1                  | PEF (% predicted)                  |
| bp343                       | PEF (L/s)                           | PEF (L/s)                      | PC ae C34:0                  | bn137                              |
| bp365                       | FEV <sub>1</sub> (% predicted)      | en101                          | PC ae C36:1                  | FEV <sub>1</sub> (% predicted)     |
| bp280                       | bn175                               | FEV <sub>1</sub> (L)           | PC aa C34:1                  | PEF (L/s)                          |
| bp366                       | SM(OH) C22:1                        | bn155                          | PC ae C38:2                  | SM C22:3                           |
| bp319                       | SM C20:2                            | bn69                           | PC ae C38:1                  | FVC (% predicted)                  |
| bp367                       | SM C26:0                            | bn205                          | PC ae C34:2                  | bn315                              |
| bp344                       | PC aa C36:6                         | FEV <sub>1</sub> (% predicted) | PC aa C32:0                  | bn195                              |
| bp318                       | PC aa C36:5                         | FVC (L)                        | PC ae C36:3                  | FEV <sub>1</sub> (L)               |
| bp339                       | Total SM(OH)                        | bn171                          | PC ae C34:3                  | FVC (L)                            |
| bp317                       | PC aa C34:4                         | bn480                          | PC with PUFA                 | C14:1                              |
| bp320                       | bn367                               | bn793                          | PC ae C32:2                  | bn262                              |
| bp281                       | PC aa C38:5                         | PEF (% predicted)              | PC ae C38:3                  | bn291                              |
| bp360                       | FVC (% predicted)                   | bn797                          | PC aa C36:0                  | ep610                              |
| bp340                       | bn368                               | ep444                          | PC ae C36:0                  | lysoPC a C28:0                     |
| bp304                       | SM(OH) C22:2                        | ep59                           | PC aa C36:2                  | lysoPC a C26:1                     |
| bp368                       | SM(OH) C16:1                        | FVC (% predicted)              | SM(OH) C16:1                 | lysoPC a C26:0                     |
| bp345                       | bn282                               | bn532                          | PC aa C34:3                  | Age (years)                        |
| bp305                       | PC ae C38:0                         | bn504                          | PC aa C32:3                  | ep684                              |
| bp361                       | SM C24:0                            | ep342                          | PC aa C40:5                  | PC aa C26:0                        |
| bn292                       | bn280                               | ep382                          | PC ae C36:2                  | bn180                              |
| bp315                       | SM(OH) C24:1                        | bp558                          | PC ae C40:1                  | Glutamine                          |
| Ever smoked                 | SM(OH) C14:1                        | ep443                          | Total SM(OH)                 | PC aa C24:0                        |
| bp369                       | bn137                               | bn315                          | PC ae C42:2                  | bn245                              |
| bp316                       | Age (years)                         | bp564                          | SM(OH) C14:1                 | bn377                              |
| bp293                       | FEV <sub>1</sub> /FVC (% predicted) | en265                          | SM(OH) C22:1                 | Acetylcarnitine/<br>free carnitine |
| bp850                       | PC aa C42:5                         | en482                          | PC aa C28:1                  | ep611                              |
| bp758                       | bn1378                              | bn114                          | bp166                        | Ornithine/Serine                   |
| bp321                       | PC aa C38:6                         | en163                          | SM C26:0                     | LysoPC a C28:1                     |
| bp760                       | PC with PUFA                        | en117                          | PC ae C34:1                  | bn190                              |

aa, two fatty acid residues bound to glycerol with ester bonds; ae, one fatty acid residue bound to glycerol with ester bond, one with ether bond; bn, bp, en, and ep, mass-to-charge (m/z) value obtained from the mass spectra from serum in negative ionization, from serum in positive ionization, exhaled breath condensate (EBC) in negative ionization and from EBC in positive ionization respectively; FEV<sub>1</sub>, forced expiratory volume in one second; FVC, forced expiratory volume; PEF, peak expiratory flow; PC, phosphatidylcholine, PUFA, polyunsaturated fatty acids; SM, sphingomyelin.

**Table S2.** Concentrations ( $\mu\text{M}$ ) of quantitatively measured metabolites in serum of control individuals and COPD patients with 2014 year A-D stratification. <LOQ below quantification limit.

| Metabolite     | COPD A                      | COPD B                       | COPD C          | COPD D           | Controls                        |
|----------------|-----------------------------|------------------------------|-----------------|------------------|---------------------------------|
| Free carnitine | 49.2 $\pm$ 30.3             | 34.9 $\pm$ 3.4               | 32.2 $\pm$ 11.5 | 32.6 $\pm$ 9.8   | 32.8 $\pm$ 7.8                  |
| AC C10 *       | 0.2 $\pm$ 0.3               | 0.2 $\pm$ 0                  | 0.2 $\pm$ 0.2   | 0.1 $\pm$ 0.2    | 0.4 $\pm$ 0.4 <sup>d</sup>      |
| AC C10:1       | <LOQ                        | <LOQ                         | <LOQ            | <LOQ             | <LOQ                            |
| AC C10:2       | <LOQ                        | <LOQ                         | <LOQ            | <LOQ             | <LOQ                            |
| AC C12         | <LOQ                        | <LOQ                         | <LOQ            | <LOQ             | <LOQ                            |
| AC C12:DC      | <LOQ                        | <LOQ                         | <LOQ            | <LOQ             | <LOQ                            |
| AC C12:1       | <LOQ                        | <LOQ                         | <LOQ            | <LOQ             | <LOQ                            |
| AC C14         | <LOQ                        | <LOQ                         | <LOQ            | <LOQ             | <LOQ                            |
| AC C14:1       | 0.05 $\pm$ 0.06             | 0.03 $\pm$ 0.00              | 0.04 $\pm$ 0.03 | 0.03 $\pm$ 0.03  | 0.07 $\pm$ 0.05                 |
| AC C14:1 OH    | 0.01 $\pm$ 0.02             | 0.01 $\pm$ 0.01              | 0.00 $\pm$ 0.01 | 0.01 $\pm$ 0.01  | 0.02 $\pm$ 0.01                 |
| AC C14:2       | 0.02 $\pm$ 0.02             | 0.01 $\pm$ 0.01              | 0.01 $\pm$ 0.01 | 0.01 $\pm$ 0.01  | 0.02 $\pm$ 0.01                 |
| AC C14:2 OH    | <LOQ                        | <LOQ                         | <LOQ            | <LOQ             | <LOQ                            |
| AC C16         | <LOQ                        | <LOQ                         | <LOQ            | <LOQ             | <LOQ                            |
| AC C16 OH      | <LOQ                        | <LOQ                         | <LOQ            | <LOQ             | <LOQ                            |
| AC C16:1 **    | 0.03 $\pm$ 0.04             | 0.01 $\pm$ 0.02              | 0.02 $\pm$ 0.02 | 0.01 $\pm$ 0.02  | 0.04 $\pm$ 0.01 <sup>d</sup>    |
| AC C16:1 OH    | 0.01 $\pm$ 0.01             | 0.01 $\pm$ 0.01              | 0.00 $\pm$ 0.01 | 0.00 $\pm$ 0.01  | 0.01 $\pm$ 0.00                 |
| AC C16:2       | <LOQ                        | <LOQ                         | <LOQ            | <LOQ             | <LOQ                            |
| AC C16:2 OH    | <LOQ                        | <LOQ                         | <LOQ            | <LOQ             | <LOQ                            |
| AC C18 *       | 0.06 $\pm$ 0.02             | 0.05 $\pm$ 0.00              | 0.04 $\pm$ 0.01 | 0.04 $\pm$ 0.01  | 0.06 $\pm$ 0.02 <sup>d</sup>    |
| AC C18:1       | 0.17 $\pm$ 0.13             | 0.12 $\pm$ 0.02              | 0.11 $\pm$ 0.01 | 0.11 $\pm$ 0.06  | 0.13 $\pm$ 0.05                 |
| AC C18:1 OH    | <LOQ                        | <LOQ                         | <LOQ            | <LOQ             | <LOQ                            |
| AC C18:2       | 0.06 $\pm$ 0.03             | 0.05 $\pm$ 0.02              | 0.04 $\pm$ 0.01 | 0.04 $\pm$ 0.02  | 0.04 $\pm$ 0.01                 |
| AC C2          | 8.3 $\pm$ 6.5               | 4.3 $\pm$ 0.01               | 5.3 $\pm$ 2.7   | 5.3 $\pm$ 2.3    | 8.8 $\pm$ 4.8                   |
| AC C3          | 0.6 $\pm$ 0.04              | 0.4 $\pm$ 0.01               | 0.4 $\pm$ 0.1   | 0.5 $\pm$ 0.2    | 0.4 $\pm$ 0.1                   |
| AC C3 OH       | <LOQ                        | <LOQ                         | <LOQ            | <LOQ             | <LOQ                            |
| AC C3:1        | <LOQ                        | <LOQ                         | <LOQ            | <LOQ             | <LOQ                            |
| AC C4          | <LOQ                        | <LOQ                         | <LOQ            | <LOQ             | <LOQ                            |
| AC C4:1        | <LOQ                        | <LOQ                         | <LOQ            | <LOQ             | <LOQ                            |
| AC C5          | <LOQ                        | <LOQ                         | <LOQ            | <LOQ             | <LOQ                            |
| AC C5 M DC     | <LOQ                        | <LOQ                         | <LOQ            | <LOQ             | <LOQ                            |
| AC C5:1        | <LOQ                        | <LOQ                         | <LOQ            | <LOQ             | <LOQ                            |
| AC C5:1 DC     | <LOQ                        | <LOQ                         | <LOQ            | <LOQ             | <LOQ                            |
| AC C6:1        | <LOQ                        | <LOQ                         | <LOQ            | <LOQ             | <LOQ                            |
| AC C7 DC       | <LOQ                        | <LOQ                         | <LOQ            | <LOQ             | <LOQ                            |
| AC C8          | <LOQ                        | <LOQ                         | <LOQ            | <LOQ             | <LOQ                            |
| AC C9          | <LOQ                        | <LOQ                         | <LOQ            | <LOQ             | <LOQ                            |
| Ala *          | 605.5 $\pm$ 121             | 482.5 $\pm$ 42               | 404.3 $\pm$ 87  | 439 $\pm$ 136    | 377.9 $\pm$ 68 <sup>a</sup>     |
| Arg **         | 147.6 $\pm$ 84              | 83.2 $\pm$ 20.7              | 167 $\pm$ 34.5  | 132.5 $\pm$ 35.5 | 99.5 $\pm$ 276.5 <sup>c,d</sup> |
| Asn            | 58.1 $\pm$ 1.6              | 45.9 $\pm$ 3.5               | 63.3 $\pm$ 23.7 | 50.9 $\pm$ 14.8  | 50.3 $\pm$ 9                    |
| Asp            | 19.3 $\pm$ 2.1              | 21.5 $\pm$ 6.6               | 19.6 $\pm$ 11.2 | 18 $\pm$ 3.4     | 22.7 $\pm$ 7.1                  |
| Cit            | 40 $\pm$ 3.5                | 37.7 $\pm$ 23.2              | 32.7 $\pm$ 20.3 | 31.5 $\pm$ 13.6  | 29.7 $\pm$ 8.4                  |
| Gln ***        | 1066 $\pm$ 175 <sup>b</sup> | 671.5 $\pm$ 7.8 <sup>a</sup> | 906 $\pm$ 230   | 947 $\pm$ 164    | 689 $\pm$ 74 <sup>a,c,d</sup>   |
| Glu            | 54.5 $\pm$ 21.4             | 48.5 $\pm$ 1.1               | 35.6 $\pm$ 13.1 | 53.6 $\pm$ 20.9  | 53.5 $\pm$ 21.7                 |
| Gly            | 323.5 $\pm$ 21.9            | 247 $\pm$ 72.1               | 359 $\pm$ 170.3 | 268.5 $\pm$ 99   | 291.7 $\pm$ 117                 |
| His            | 95.1 $\pm$ 16.8             | 80.2 $\pm$ 10.2              | 89.9 $\pm$ 21.3 | 87.9 $\pm$ 13.2  | 87.9 $\pm$ 12.6                 |

|                      |                               |                             |                         |                            |                            |
|----------------------|-------------------------------|-----------------------------|-------------------------|----------------------------|----------------------------|
| Ile                  | 96.5 ± 37.5                   | 75.6 ± 8.4                  | 86.6 ± 18.6             | 92.9 ± 31.4                | 70.2 ± 16.8                |
| Leu                  | 180 ± 60.8                    | 141 ± 4.2                   | 149.5 ± 31.7            | 178.1 ± 79.3               | 137.9 ± 36                 |
| Lys                  | 186.5 ± 16.3                  | 160 ± 15.6                  | 196.3 ± 34.9            | 189.6 ± 33.7               | 200 ± 37.8                 |
| Met                  | 27.6 ± 8                      | 20.3 ± 5.1                  | 29.1 ± 7.3              | 24.4 ± 7.9                 | 22.8 ± 4.5                 |
| Orn **               | 116.7 ± 25.9                  | 109.3 ± 30.8                | 82.4 ± 23.4             | 113.4 ± 23.6               | 80.1 ± 22.4 <sup>d</sup>   |
| Phe **               | 75.5 ± 4.2                    | 78 ± 10                     | 77.9 ± 8.3              | 76.2 ± 13.3                | 62.7 ± 10.8 <sup>d</sup>   |
| Pro                  | 355 ± 178                     | 296.5 ± 122                 | 271.3 ± 122             | 276.2 ± 106                | 201.5 ± 52                 |
| Ser *                | 124.5 ± 16.3                  | 99.4 ± 23.5                 | 131.8 ± 24.3            | 103.7 ± 19.5               | 129.3 ± 287.4 <sup>d</sup> |
| Thr                  | 120.5 ± 37.5                  | 112 ± 0                     | 128.2 ± 43.5            | 131.3 ± 45.1               | 142.7 ± 26.7               |
| Trp                  | 69.5 ± 1.6                    | 59.2 ± 15.5                 | 53.9 ± 11.1             | 65.4 ± 16.3                | 64.5 ± 12.3                |
| Tyr **               | 85.5 ± 12.1                   | 85.7 ± 11.7                 | 80.2 ± 17               | 95.4 ± 28.8                | 66.1 ± 17 <sup>d</sup>     |
| Val                  | 290 ± 89.1                    | 216.5 ± 29                  | 203.3 ± 32.5            | 232.8 ± 57                 | 213.5 ± 39.6               |
| Acetylmethionine     | <LOQ                          | <LOQ                        | <LOQ                    | <LOQ                       | <LOQ                       |
| ADMA                 | 0.6 ± 0.0                     | 0.6 ± 0.3                   | 0.4 ± 0.2               | 0.5 ± 0.1                  | 0.4 ± 0.1                  |
| SDMA                 | <LOQ                          | <LOQ                        | <LOQ                    | <LOQ                       | <LOQ                       |
| α-Aminoadipic acid   | <LOQ                          | <LOQ                        | <LOQ                    | <LOQ                       | <LOQ                       |
| Carnosine            | <LOQ                          | <LOQ                        | <LOQ                    | <LOQ                       | <LOQ                       |
| Creatinine           | 107 ± 28.4                    | 100.6 ± 4.8                 | 76.6 ± 16.1             | 89.1 ± 31.5                | 75.9 ± 18.7                |
| DOPA                 | <LOQ                          | <LOQ                        | <LOQ                    | <LOQ                       | <LOQ                       |
| Dopamine             | <LOQ                          | <LOQ                        | <LOQ                    | <LOQ                       | <LOQ                       |
| Histamine            | <LOQ                          | <LOQ                        | <LOQ                    | <LOQ                       | <LOQ                       |
| Kynurenine ***       | 4.3 ± 0.9 <sup>b</sup>        | 10.1 ± 6.5 <sup>a,c,d</sup> | 3.7 ± 1.3 <sup>b</sup>  | 4.5 ± 1.6 <sup>b</sup>     | 3 ± 1 <sup>b,d</sup>       |
| Methionine sulfoxide | <LOQ                          | <LOQ                        | <LOQ                    | <LOQ                       | <LOQ                       |
| Nitro-Tyr            | <LOQ                          | <LOQ                        | <LOQ                    | <LOQ                       | <LOQ                       |
| Putrescine           | 0.1 ± 0                       | 0.1 ± 0.0                   | 0.2 ± 0.1               | 0.2 ± 0.1                  | 0.1 ± 0.1                  |
| Serotonin            | 0.5 ± 0.2                     | 0.2 ± 0.1                   | 0.4 ± 0.2               | 0.5 ± 0.3                  | 0.6 ± 0.3                  |
| Spermine             | <LOQ                          | <LOQ                        | <LOQ                    | <LOQ                       | <LOQ                       |
| Cis- 4-OH Pro        | <LOQ                          | <LOQ                        | <LOQ                    | <LOQ                       | <LOQ                       |
| Trans 4-OH Pro ***   | 16.1 ± 9.3                    | 11.8 ± 1.7                  | 12.4 ± 7                | 13.3 ± 8.1                 | 3.2 ± 4.5 <sup>d</sup>     |
| Taurine              | 83.1 ± 10.3                   | 73.5 ± 19.6                 | 114.7 ± 28.8            | 115.2 ± 55.1               | 104 ± 28.9                 |
| lysoPC a C14:0       | <LOQ                          | <LOQ                        | <LOQ                    | <LOQ                       | <LOQ                       |
| lysoPC a C16:0 *     | 195 ± 96.2 <sup>d</sup>       | 118 ± 24                    | 128.5 ± 14              | 120.2 ± 276.9 <sup>a</sup> | 141.6 ± 24.8               |
| lysoPC a C16:1       | 6.4 ± 2.9                     | 3.8 ± 2                     | 5.1 ± 1.7               | 4.2 ± 1.5                  | 4 ± 0.9                    |
| lysoPC a C17:0 **    | 4.6 ± 2.6 <sup>b,c,d</sup>    | 1.9 ± 0.3 <sup>a</sup>      | 1.9 ± 0.5 <sup>a</sup>  | 2.3 ± 0.7 <sup>a</sup>     | 2.6 ± 0.6 <sup>a</sup>     |
| lysoPC a C18:0 **    | 61.9 ± 421.4 <sup>b,c,d</sup> | 28.8 ± 3.5 <sup>a</sup>     | 31.9 ± 4.5 <sup>a</sup> | 31.6 ± 8.2 <sup>a</sup>    | 41.2 ± 11.4                |
| lysoPC a C18:1 *     | 47.3 ± 265.7 <sup>c,d</sup>   | 26.7 ± 6.6                  | 33.9 ± 7.3 <sup>a</sup> | 27.6 ± 6.9 <sup>a</sup>    | 30.6 ± 6.6 <sup>a</sup>    |
| lysoPC a C18:2 *     | 71.8 ± 54 <sup>d</sup>        | 36.5 ± 2.9                  | 48.9 ± 16.7             | 36.1 ± 9.3 <sup>a</sup>    | 44 ± 13.2                  |
| lysoPC a C20:3 *     | 5 ± 3.9 <sup>b,d</sup>        | 2.2 ± 0.6 <sup>a</sup>      | 3.1 ± 0.6               | 2.6 ± 0.9 <sup>a</sup>     | 2.8 ± 0.7                  |

|                |                 |                 |                 |                 |                                            |
|----------------|-----------------|-----------------|-----------------|-----------------|--------------------------------------------|
| lysoPC a C20:4 | 11.5 ± 6.4      | 8 ± 0.3         | 10.3 ± 2.7      | 8.3 ± 1.7       | 8.6 ± 2.7                                  |
| lysoPC a C24:0 | 0.9 ± 0.1       | 1.1 ± 0.1       | 0.9 ± 0.1       | 1.1 ± 0.5       | 0.7 ± 0.6                                  |
| lysoPC a C26:0 | 1.9 ± 0.3       | 2.2 ± 0.1       | 1.8 ± 0.3       | 2.1 ± 0.7       | 1.5 ± 1.4                                  |
| lysoPC a C26:1 | 0.9 ± 0         | 1.3 ± 0.1       | 1.1 ± 0.2       | 1.3 ± 0.4       | 0.9 ± 0.8                                  |
| lysoPC a C28:0 | 1.2 ± 0.3       | 1.1 ± 0         | 1 ± 0.1         | 1.3 ± 0.4       | 1 ± 0.8                                    |
| lysoPC a C28:1 | 1.2 ± 0.1       | 1.3 ± 0.1       | 1.1 ± 0.1       | 1.4 ± 0.4       | 1.1 ± 0.9                                  |
| PC aa C24:0    | 0.7 ± 0.2       | 0.9 ± 0.1       | 0.7 ± 0.1       | 0.9 ± 0.3       | 0.6 ± 0.5                                  |
| PC aa C26:0    | 4.3 ± 0.1       | 6.2 ± 0.4       | 4.5 ± 0.9       | 5.4 ± 1.8       | 3.3 ± 3.2                                  |
| PC aa C28:1    | 4 ± 0.3         | 3.2 ± 0.7       | 2.8 ± 0.2       | 3.7 ± 0.7       | 3.9 ± 1.3                                  |
| PC aa C30:0    | 4.6 ± 0.8       | 4.6 ± 2.6       | 3.8 ± 1.2       | 5.4 ± 2.2       | 5.2 ± 2                                    |
| PC aa C30:2    | 0.2 ± 0.1       | 0.1 ± 0.2       | 0.2 ± 0.1       | 0.2 ± 0.1       | 0.4 ± 0.3                                  |
| PC aa C32:0    | 12.8 ± 1.3      | 15.1 ± 6.4      | 12.6 ± 2.8      | 14.2 ± 3.6      | 13.8 ± 3.6                                 |
| PC aa C32:1    | 16.8 ± 3.9      | 16.4 ± 15.8     | 17.5 ± 9.9      | 19.5 ± 11       | 16.2 ± 6.7                                 |
| PC aa C32:2 *  | 2.6 ± 1.1       | 2.1 ± 1.1       | 1.8 ± 0.4       | 2.9 ± 1.1       | 4.0 ± 1.5 <sup>c</sup>                     |
| PC aa C32:3    | 0.4 ± 0.1       | 0.4 ± 0.1       | 0.3 ± 0         | 0.5 ± 0.1       | 0.5 ± 0.2                                  |
| PC aa C34:1    | 192 ± 41        | 184.5 ± 112     | 163.8 ± 38      | 187.2 ± 50      | 205.5 ± 54                                 |
| PC aa C34:2 ** | 303.5 ± 66      | 278.5 ± 79      | 253.8 ± 32      | 289.3 ± 50      | 361.7 ± 83<br><sup>c,d</sup>               |
| PC aa C34:3    | 13.7 ± 6.5      | 10 ± 6.9        | 9.4 ± 2.9       | 12.8 ± 5        | 15.1 ± 4.7                                 |
| PC aa C34:4 ** | 1.2 ± 0.7       | 0.7 ± 0.4       | 0.7 ± 0.3       | 1.1 ± 0.4       | 1.6 ± 0.5 <sup>c,d</sup>                   |
| PC aa C36:0    | 1.5 ± 0.5       | 1.5 ± 0.9       | 1.5 ± 0.4       | 1.9 ± 0.8       | 2.4 ± 1                                    |
| PC aa C36:1    | 48.3 ± 29.8     | 38 ± 23.3       | 33.1 ± 10.1     | 41 ± 11.7       | 45.6 ± 14.7                                |
| PC aa C36:2    | 205 ± 79.2      | 168.5 ±<br>51.6 | 151.8 ±<br>28.3 | 179.6 ±<br>34.7 | 226.9 ±<br>66.2                            |
| PC aa C36:3    | 108.1 ±<br>43.7 | 84.1 ± 39.5     | 85.4 ± 16.8     | 96.4 ± 24.5     | 120.8 ±<br>37.2                            |
| PC aa C36:4 ** | 129.1 ±<br>62.2 | 104.7 ±<br>30.2 | 114.9 ±<br>24.8 | 125.6 ±<br>23.2 | 167.7 ±<br><del>465.7</del> <sup>c,d</sup> |
| PC aa C36:5    | 15.2 ± 5.6      | 17.9 ± 15.5     | 14.1 ± 4.3      | 20.7 ± 7.7      | 34.3 ± 21.8                                |
| PC aa C36:6 ** | 0.6 ± 0.2       | 0.6 ± 0.4       | 0.4 ± 0.1       | 0.7 ± 0.3       | 1.1 ± 0.5 <sup>c,d</sup>                   |
| PC aa C38:0    | 2.1 ± 0.2       | 2.7 ± 1.6       | 1.9 ± 0.3       | 2.4 ± 0.7       | 2.7 ± 1                                    |
| PC aa C38:1    | 0.7 ± 0         | 0.9 ± 0.1       | 0.8 ± 0.2       | 1 ± 0.4         | 1.2 ± 0.6                                  |
| PC aa C38:3    | 40.9 ± 21       | 28.4 ± 14.6     | 30.6 ± 13.8     | 37.2 ± 12.5     | 41.2 ± 13.8                                |
| PC aa C38:4    | 77.1 ± 40.9     | 54.3 ± 12.5     | 56.6 ± 16.3     | 66.6 ± 18.3     | 88.7 ± 30                                  |
| PC aa C38:5 ** | 39.6 ± 17.7     | 32.3 ± 17.5     | 28.8 ± 6.3      | 35.6 ± 8.5      | 53.8 ±<br><del>187.8</del> <sup>c,d</sup>  |
| PC aa C38:6 ** | 54.7 ± 2.8      | 58 ± 36.2       | 47.8 ± 12.8     | 61.7 ± 16.3     | 84.6 ±<br><del>298.3</del> <sup>c,d</sup>  |
| PC aa C40:1    | <LOQ            | <LOQ            | <LOQ            | <LOQ            | <LOQ                                       |
| PC aa C40:2    | 0.3 ± 0         | 0.4 ± 0         | 0.3 ± 0         | 0.4 ± 0.1       | 0.4 ± 0.1                                  |
| PC aa C40:3    | 0.4 ± 0.1       | 0.4 ± 0.1       | 0.4 ± 0         | 0.5 ± 0.1       | 0.5 ± 0.1                                  |
| PC aa C40:4    | 3.4 ± 2.2       | 1.9 ± 0.7       | 2 ± 0.5         | 2.3 ± 0.6       | 2.7 ± 0.7                                  |
| PC aa C40:5    | 9.1 ± 5.5       | 6 ± 3.9         | 5.2 ± 1.8       | 6.4 ± 2         | 8.2 ± 2.4                                  |
| PC aa C40:6    | 24 ± 9.1        | 23.4 ± 18.4     | 17.5 ± 7.4      | 24.3 ± 7.9      | 28.1 ± 11.3                                |
| PC aa C42:0    | 0.4 ± 0         | 0.5 ± 0.2       | 0.4 ± 0.1       | 0.6 ± 0.2       | 0.5 ± 0.1                                  |
| PC aa C42:1    | 0.3 ± 0.1       | 0.2 ± 0.1       | 0.2 ± 0         | 0.3 ± 0.1       | 0.3 ± 0                                    |
| PC aa C42:2    | 0.2 ± 0         | 0.3 ± 0.1       | 0.2 ± 0         | 0.3 ± 0.1       | 0.2 ± 0.1                                  |
| PC aa C42:4    | 0.2 ± 0         | 0.2 ± 0         | 0.1 ± 0         | 0.2 ± 0         | 0.2 ± 0                                    |
| PC aa C42:5 ** | 0.3 ± 0.1       | 0.2 ± 0.1       | 0.2 ± 0         | 0.3 ± 0.1       | 0.4 ± 0.1 <sup>c,d</sup>                   |
| PC aa C42:6    | 0.4 ± 0.6       | 0.6 ± 0         | 0.6 ± 0         | 0.6 ± 0.2       | 0.7 ± 0.2                                  |
| PC ae C30:0    | 0.6 ± 0         | 0.6 ± 0.2       | 0.4 ± 0.1       | 0.6 ± 0.2       | 0.5 ± 0.2                                  |
| PC ae C30:1    | 0.8 ± 0         | 1 ± 0.1         | 0.8 ± 0.1       | 1 ± 0.3         | 0.8 ± 0.6                                  |

|                 |            |            |            |             |                               |
|-----------------|------------|------------|------------|-------------|-------------------------------|
| PC ae C30:2     | 0.2 ± 0    | 0.2 ± 0    | 0.2 ± 0    | 0.2 ± 0.1   | 0.2 ± 0.1                     |
| PC ae C32:1     | 2.4 ± 0    | 2.3 ± 0.7  | 2.4 ± 0.5  | 2.9 ± 1     | 2.8 ± 0.6                     |
| PC ae C32:2     | 0.7 ± 0    | 0.7 ± 0.1  | 0.7 ± 0.1  | 0.9 ± 0.2   | 0.9 ± 0.3                     |
| PC ae C34:0     | 1.3 ± 0.2  | 1.1 ± 0.5  | 0.9 ± 0.1  | 1.3 ± 0.5   | 1.4 ± 0.5                     |
| PC ae C34:1     | 9.1 ± 1    | 9.1 ± 4.8  | 7.3 ± 1.8  | 9.5 ± 3.7   | 9.4 ± 2.3                     |
| PC ae C34:2     | 8.8 ± 1.3  | 7.1 ± 2.5  | 7 ± 1.9    | 8.3 ± 3.2   | 10.3 ± 2.7                    |
| PC ae C34:3 **  | 3.9 ± 0.2  | 3.4 ± 0.6  | 5.3 ± 2    | 4.5 ± 2     | 6.6 ± 1.6 <sup>c,d</sup>      |
| PC ae C36:0     | 0.7 ± 0    | 0.8 ± 0.4  | 0.8 ± 0.2  | 0.9 ± 0.3   | 0.8 ± 0.3                     |
| PC ae C36:1     | 8 ± 2      | 6 ± 2.4    | 5.2 ± 0.3  | 7.3 ± 2.5   | 8.2 ± 2.3                     |
| PC ae C36:2     | 13.2 ± 3.7 | 9.3 ± 2.2  | 8.6 ± 1.3  | 11.2 ± 3.5  | 13.3 ± 4                      |
| PC ae C36:3     | 5.8 ± 1.4  | 4.5 ± 1.5  | 4.8 ± 1.1  | 5.1 ± 1.8   | 6.4 ± 1.6                     |
| PC ae C36:4 *   | 11.9 ± 1.6 | 11.8 ± 4.4 | 9.3 ± 1.2  | 10.6 ± 3.2  | 13.6 ± 3.1 <sup>d</sup>       |
| PC ae C36:5     | 6 ± 0.1    | 5.6 ± 2    | 7.3 ± 2    | 7.5 ± 2.6   | 9.6 ± 3                       |
| PC ae C38:0 **  | 1.4 ± 0.4  | 1.2 ± 0.6  | 1.1 ± 0.2  | 1.4 ± 0.4   | 2.2 ± 0.8 <sup>c,d</sup>      |
| PC ae C38:1     | 0.5 ± 0.1  | 0.5 ± 0.2  | 0.6 ± 0.1  | 0.6 ± 0.2   | 0.6 ± 0.2                     |
| PC ae C38:2     | 2 ± 0.7    | 1.7 ± 0.3  | 1.6 ± 0.2  | 1.8 ± 0.5   | 2.1 ± 0.6                     |
| PC ae C38:3     | 3.7 ± 1.3  | 2.5 ± 0.9  | 2.5 ± 0.3  | 3.1 ± 0.9   | 3.7 ± 0.9                     |
| PC ae C38:4     | 10.6 ± 3.2 | 8.8 ± 1.2  | 7.5 ± 1.1  | 9 ± 2.5     | 10.6 ± 2.3                    |
| PC ae C38:5     | 12.5 ± 1.1 | 13.5 ± 4   | 11.4 ± 2.1 | 12.6 ± 3.1  | 14.6 ± 3.3                    |
| PC ae C38:6     | 4.7 ± 0.2  | 5.5 ± 3.4  | 4.5 ± 0.9  | 5.6 ± 2     | 7.2 ± 2.8                     |
| PC ae C40:1     | 1.7 ± 0.5  | 1.4 ± 0.2  | 1.4 ± 0.3  | 1.6 ± 0.3   | 1.6 ± 0.8                     |
| PC ae C40:2     | 1.4 ± 0.1  | 1.3 ± 0.5  | 1.3 ± 0.1  | 1.6 ± 0.4   | 1.9 ± 0.6                     |
| PC ae C40:3     | 0.8 ± 0.1  | 0.7 ± 0.1  | 0.8 ± 0.1  | 0.9 ± 0.2   | 1 ± 0.2                       |
| PC ae C40:4     | 1.8 ± 0.5  | 1.7 ± 0.4  | 1.6 ± 0.2  | 1.9 ± 0.5   | 1.9 ± 0.4                     |
| PC ae C40:5     | 2.9 ± 0.5  | 2.5 ± 1    | 2.3 ± 0.4  | 2.8 ± 0.8   | 3.1 ± 0.5                     |
| PC ae C40:6     | 3.8 ± 0.5  | 4 ± 2.2    | 2.7 ± 0.3  | 3.7 ± 1.1   | 4.4 ± 1.3                     |
| PC ae C42:0     | <LOQ       | <LOQ       | <LOQ       | <LOQ        | <LOQ                          |
| PC ae C42:1     | 0.7 ± 0.1  | 0.7 ± 0    | 0.7 ± 0.1  | 0.8 ± 0.2   | 0.7 ± 0.4                     |
| PC ae C42:2     | 0.7 ± 0.1  | 0.6 ± 0.2  | 0.5 ± 0    | 0.7 ± 0.1   | 0.7 ± 0.3                     |
| PC ae C42:3     | 0.9 ± 0.1  | 0.8 ± 0.2  | 0.8 ± 0.1  | 1 ± 0.2     | 1 ± 0.4                       |
| PC ae C42:4     | 0.7 ± 0.1  | 0.6 ± 0.2  | 0.6 ± 0.1  | 0.8 ± 0.3   | 0.8 ± 0.2                     |
| PC ae C42:5     | 1.5 ± 0.1  | 1.5 ± 0.4  | 1.6 ± 0.4  | 1.8 ± 0.5   | 1.7 ± 0.3                     |
| PC ae C44:3     | 0.2 ± 0    | 0.2 ± 0.1  | 0.2 ± 0    | 0.3 ± 0.1   | 0.2 ± 0.1                     |
| PC ae C44:4     | 0.3 ± 0    | 0.3 ± 0.1  | 0.4 ± 0.1  | 0.4 ± 0.1   | 0.4 ± 0.1                     |
| PC ae C44:5     | 1.2 ± 0    | 1.2 ± 0.2  | 1.5 ± 0.6  | 1.7 ± 0.5   | 1.5 ± 0.4                     |
| PC ae C44:6     | 0.9 ± 0.1  | 0.9 ± 0.2  | 0.9 ± 0.3  | 1.1 ± 0.3   | 1 ± 0.2                       |
| SM(OH)C14:1 **  | 4.3 ± 0.7  | 2.6 ± 0.2  | 2.7 ± 0.6  | 3.8 ± 1.1   | 5.1 ± 1.4 <sup>c,d</sup>      |
| SM(OH)C16:1 **  | 1.8 ± 0.2  | 1.3 ± 0.2  | 1.3 ± 0.2  | 1.8 ± 0.5   | 2.4 ± 0.7 <sup>c,d</sup>      |
| SM(OH)C22:1 *** | 5.9 ± 0.8  | 3.9 ± 0.1  | 4.7 ± 0.9  | 5.6 ± 1.6   | 8.7 ± 2.6<br><sup>b,c,d</sup> |
| SM(OH)C22:2 *** | 5.3 ± 0.6  | 3.5 ± 0    | 4.2 ± 1.1  | 5.4 ± 1.6   | 7.8 ± 2.3<br><sup>b,c,d</sup> |
| SM(OH)C24:1 *** | 0.6 ± 0    | 0.4 ± 0    | 0.6 ± 0    | 0.6 ± 0.2   | 0.9 ± 0.3<br><sup>b,c,d</sup> |
| SM C16:0 **     | 58.5 ± 2.3 | 56.7 ± 1.1 | 61.3 ± 7.4 | 66.8 ± 12.5 | 81.5 ± 18.6<br><sup>d</sup>   |
| SM C16:1 **     | 7.5 ± 0.1  | 7.5 ± 0.2  | 7.3 ± 1.6  | 9.4 ± 2     | 11.6 ± 3.2 <sup>c</sup>       |
| SM C18:0        | 10 ± 0.5   | 9.2 ± 1.7  | 11 ± 1.8   | 12.9 ± 2.9  | 16.4 ± 5.1                    |
| SM C18:1 **     | 4 ± 0.2    | 4.2 ± 1.2  | 4.2 ± 0.6  | 5.6 ± 1.5   | 7.1 ± 2.3 <sup>c</sup>        |
| SM C20:2 ***    | 0.3 ± 0.1  | 0.2 ± 0    | 0.2 ± 0    | 0.3 ± 0.1   | 0.5 ± 0.1<br><sup>b,c,d</sup> |

|              |                |                |                |                |                                            |
|--------------|----------------|----------------|----------------|----------------|--------------------------------------------|
| SM C22:3 *** | 1.1 ± 0.9      | 0.4 ± 0.3      | 0.8 ± 0.1      | 0.7 ± 0.3      | 2.5 ± 1.3<br>b,c,d                         |
| SM C24:0 *** | 9 ± 3          | 6.7 ± 0.6      | 8.8 ± 0.5      | 9.4 ± 1.8      | 13.2 ±<br><del>43.2</del> <sup>b,c,d</sup> |
| SM C24:1     | 22.8 ± 1.1     | 23.2 ± 0.1     | 30.2 ± 5.6     | 31.3 ± 6.7     | 35.5 ± 10.1                                |
| SM C26:0 *** | 0.1 ± 0        | 0.1 ± 0        | 0.1 ± 0        | 0.1 ± 0        | 0.2 ± 0 <sup>a,b,c,d</sup>                 |
| SM C26:1     | 0.2 ± 0        | 0.2 ± 0.1      | 0.3 ± 0.1      | 0.3 ± 0.1      | 0.4 ± 0.1                                  |
| Hexoses      | 5028 ±<br>1561 | 6694 ±<br>2944 | 5928 ±<br>2387 | 4683 ±<br>1318 | 4109 ± 832                                 |

aa, two fatty acid residues bound to glycerol with ester bonds; AC, acylcarnitine with fatty acid residue of given length; ADMA, asymmetric dimethylarginine; ae, one fatty acid residue bound to glycerol with ester bond, one with ether bond; PC, phosphatidylcholine with fatty acid residue of given length; SDMA, symmetric dimethylarginine; SM, sphingomyeline with fatty acid residue of given length; SM(OH), hydroxylated sphingomyeline with fatty acid residue of given length; \*, \*\* and \*\*\* statistical significance in ANOVA with  $p < 0.05$ ,  $p < 0.01$  and  $p < 0.001$ , respectively. Statistical differences between groups in post-hoc analysis are indicated with <sup>a,b,c,d</sup>.

**Table S3.** Comparison of the validation characteristics of the two best fitting hierarchical clustering of the patients with chronic obstructive pulmonary disease (COPD) (n = 25). In the principal component analysis (PCA) based clustering only the five highest principal components, which all explained >5% of total variance, were used. Sparse partial least squares discriminant analysis (sPLSDA) served as the positive control, since this clustering is performed on multivariate analysis that optimizes the dataset for predefined clusters (in the current analysis the Global Initiative for Chronic Obstructive Lung Disease (GOLD) A-D (2011) strata).

| R package   | Validation characteristic or description                                                                 | PCA                            | sPLSDA                         |
|-------------|----------------------------------------------------------------------------------------------------------|--------------------------------|--------------------------------|
|             |                                                                                                          | COPD patients only<br>All data | COPD patients only<br>All data |
| fpc         | Optimal number of clusters                                                                               | 6                              | 4                              |
|             | average distance between clusters                                                                        | 5.78                           | 12.76                          |
|             | average distance within clusters                                                                         | 2.79                           | 3.34                           |
|             | maximum cluster diameter                                                                                 | 4.67                           | 8.34                           |
|             | minimum cluster separation                                                                               | 2.18                           | 5.70                           |
|             | average silhouette widths                                                                                | 0.36                           | 0.68                           |
|             | correlation between distances and means of same and different clusters                                   | 0.57                           | 0.90                           |
|             | ratio of minimum separation and maximum diameter                                                         | 0.47                           | 0.68                           |
|             | ratio of minimum average dissimilarity between clusters and maximum average within cluster dissimilarity | 1.15                           | 2.45                           |
|             | entropy of the distribution of cluster memberships                                                       | 1.70                           | 0.96                           |
|             | ratio of average within and average between clusters                                                     | 0.48                           | 0.26                           |
|             | Calinski-Harabasz pseudo F-statistic                                                                     | 13.33                          | 49.18                          |
| cluster-Sim | Davies-Bouldin index                                                                                     | 1.04                           | 0.47                           |
|             | Calinski-Harabasz pseudo F-statistic                                                                     | 10.38                          | 46.29                          |
|             | Baker and Hubert adaption of Goodman and Kruskal's gamma statistics                                      | 0.84                           | 1.00                           |
|             | Hubert and Levine internal cluster quality index                                                         | 0.39                           | 0.37                           |
|             | Rousseeuw's Silhouette internal cluster quality index                                                    | 0.32                           | 0.68                           |
| clValid     | average proportion of non-overlap                                                                        | 0.22                           | 0.00                           |
|             | average distance                                                                                         | 2.92                           | 2.87                           |
|             | average distance between means                                                                           | 1.46                           | 0.00                           |
|             | Figure of merit                                                                                          | 1.72                           | 0.75                           |
|             | Connectivity                                                                                             | 27.07                          | 12.10                          |
|             | Dunn index                                                                                               | 0.46                           | 0.68                           |
|             | Silhouette                                                                                               | 0.33                           | 0.68                           |

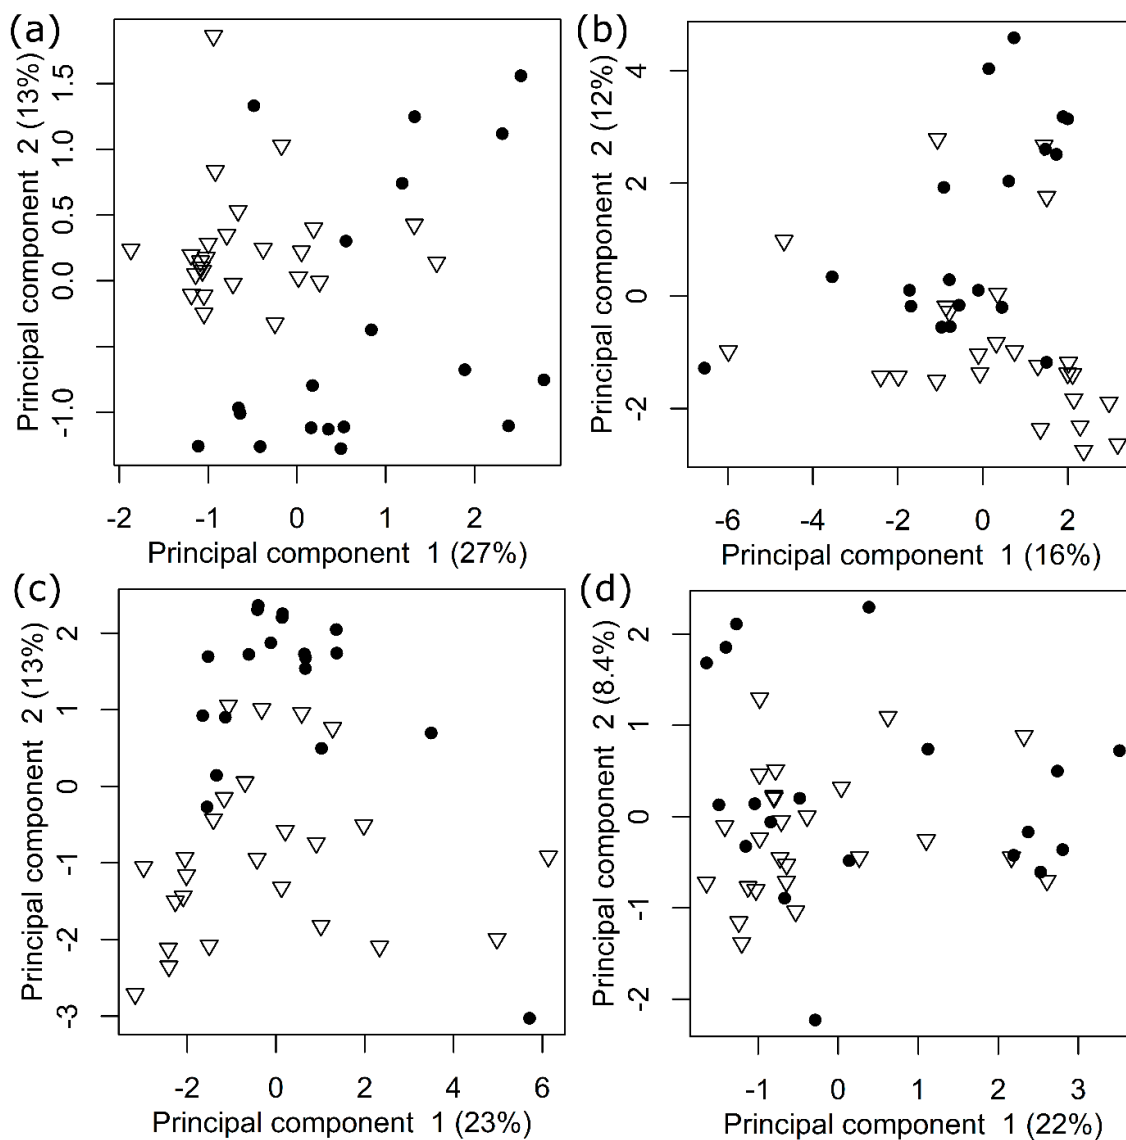

**Figure S1.** Principal component analysis of (a) targeted metabolites, (b) untargeted metabolic profiles, (c) untargeted metabolic profiles of blood serum only and (d) untargeted metabolic profiles of exhaled breath condensate only of the patients with chronic obstructive pulmonary disease (COPD, empty triangles) and the control individuals (solid circles). The percentage in parenthesis indicates the fraction from total variance explained by the respective principal component.

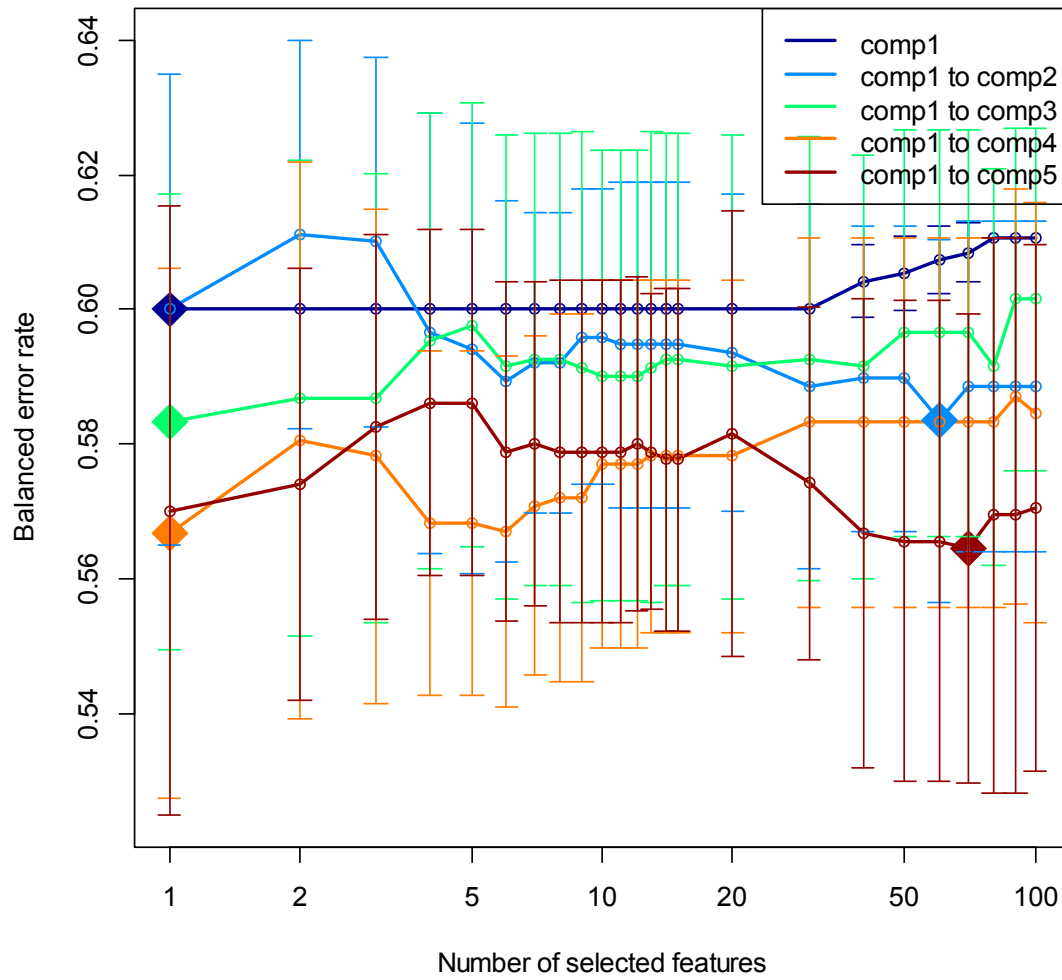

**Figure S2.** Tuning of sparse least squares discriminant analysis. Withing the error limits the performance of the model is relatively independent on number of components and number of parameters kept (x-axis). Two components (blue line) with 60 input variables was chosen for presentation in the article.
